# Supplementary material for: The Heterogeneity of Longitudinal Cognitive Decline in Euthymic Bipolar I Disorder With Clinical Characteristics and Functional Outcomes
Source: Frontiers journal article supplement (doi:10.3389/fpsyt.2021.684813), 2021-07-21
Supplement: Data_Sheet_1.PDF [file Data_Sheet_1.PDF]

Supplementary Figure 1. Time points assessing cognitive function in current study

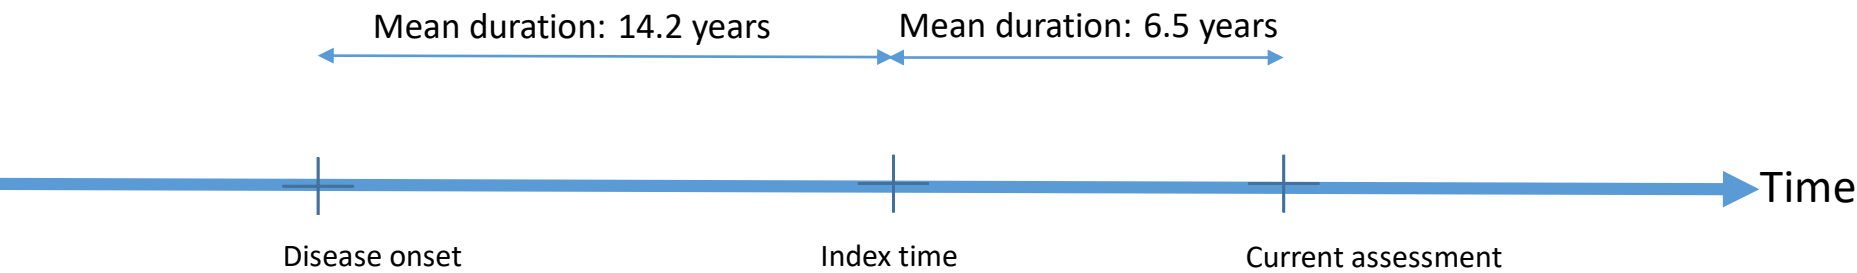

| Time point  | T1                       | T2      | T3    |
|-------------|--------------------------|---------|-------|
| Measurement | Estimated premorbid IQ * | WASI IQ | BAC-A |

\*Estimated premorbid IQ based on age, gender, occupational status and years of education from Taiwan norm data  
Abbreviations: WASI, Wechsler Adult Intelligence Scale; IQ, Intelligence Quotient ; BAC-A, Brief Assessment of Cognition in Affective Disorders
